# Supplementary material for: Radiographic Diagnosis of Hip Laxity in Rottweilers: Interobserver Agreement at Eight- and Twelve-Months of Age
Source: MDPI journal article supplement (doi:10.3390/ani13020231), 2023-01-08
Supplement: s1 [file s1]

## Supplementary Materials

**Figure S1.** Result of general linear model and Bonferroni's alpha correction procedure: results of multiple comparisons between 4, 8, and 12 months of age.

| Multiple Comparisons |                      |                      |                       |            |       |                         |             |
|----------------------|----------------------|----------------------|-----------------------|------------|-------|-------------------------|-------------|
| Bonferroni           |                      |                      |                       |            |       |                         |             |
| Dependent Variable   | (I) Examination_Date | (J) Examination_Date | Mean Difference (I-J) | Std. Error | Sig.  | 95% Confidence Interval |             |
|                      |                      |                      |                       |            |       | Lower Bound             | Upper Bound |
| NA                   | 4 Month Old          | 8 Month Old          | -4,1032*              | ,57140     | ,000  | -5,4740                 | -2,7324     |
|                      |                      | 12 Month Old         | -2,8464*              | ,57761     | ,000  | -4,2321                 | -1,4608     |
|                      | 8 Month Old          | 4 Month Old          | 4,1032*               | ,57140     | ,000  | 2,7324                  | 5,4740      |
|                      |                      | 12 Month Old         | 1,2568                | ,56975     | ,083  | -,1101                  | 2,6236      |
|                      | 12 Month Old         | 4 Month Old          | 2,8464*               | ,57761     | ,000  | 1,4608                  | 4,2321      |
|                      |                      | 8 Month Old          | -1,2568               | ,56975     | ,083  | -2,6236                 | ,1101       |
| DI                   | 4 Month Old          | 8 Month Old          | ,1352*                | ,01305     | ,000  | ,1038                   | ,1665       |
|                      |                      | 12 Month Old         | ,1493*                | ,01320     | ,000  | ,1176                   | ,1809       |
|                      | 8 Month Old          | 4 Month Old          | -,1352*               | ,01305     | ,000  | -,1665                  | -,1038      |
|                      |                      | 12 Month Old         | ,0141                 | ,01302     | ,837  | -,0171                  | ,0453       |
|                      | 12 Month Old         | 4 Month Old          | -,1493*               | ,01320     | ,000  | -,1809                  | -,1176      |
|                      |                      | 8 Month Old          | -,0141                | ,01302     | ,837  | -,0453                  | ,0171       |
| DAR_Slop             | 4 Month Old          | 8 Month Old          | 2,4590*               | ,39939     | ,000  | 1,5009                  | 3,4171      |
|                      |                      | 12 Month Old         | 1,8815*               | ,40373     | ,000  | ,9129                   | 2,8500      |
|                      | 8 Month Old          | 4 Month Old          | -2,4590*              | ,39939     | ,000  | -3,4171                 | -1,5009     |
|                      |                      | 12 Month Old         | -,5775                | ,39823     | ,442  | -1,5329                 | ,3778       |
|                      | 12 Month Old         | 4 Month Old          | -1,8815*              | ,40373     | ,000  | -2,8500                 | -,9129      |
|                      |                      | 8 Month Old          | ,5775                 | ,39823     | ,442  | -,3778                  | 1,5329      |
| CEA                  | 4 Month Old          | 8 Month Old          | -1,0621               | ,50876     | ,111  | -2,2826                 | ,1584       |
|                      |                      | 12 Month Old         | ,3844                 | ,51429     | 1,000 | -,8494                  | 1,6182      |
|                      | 8 Month Old          | 4 Month Old          | 1,0621                | ,50876     | ,111  | -,1584                  | 2,2826      |
|                      |                      | 12 Month Old         | 1,4465*               | ,50729     | ,013  | ,2295                   | 2,6635      |
|                      | 12 Month Old         | 4 Month Old          | -,3844                | ,51429     | 1,000 | -1,6182                 | ,8494       |
|                      |                      | 8 Month Old          | -1,4465*              | ,50729     | ,013  | -2,6635                 | -,2295      |

Based on observed means.

The error term is Mean Square(Error) = 35,111.

\*. The mean difference is significant at the ,05 level.

**Figure S2.** Results of Cohen's kappa coefficient calculated for qualitative parameters at 8 and 12 months of age.

The inter-observer reliability of the qualitative parameters was calculated using Cohen's kappa coefficient ( $\kappa$ ). The kappa ranges from 0 (no agreement) to 1 (excellent agreement). The parameters with a kappa below 0.20 indicate poor agreement, and the parameters between 0.21 and 0.40 indicate weak agreement. The parameters between 0.41 and 0.60, and between 0.61 and 0.80 indicate moderate and good agreements, respectively. Results with a kappa above 0.80 indicate excellent agreement.

#### SCAR eight months of age

|            | OBSERVER 1 | OBSERVER 2 | OBSERVER 3 | OBSERVER 4 | OBSERVER 5 |
|------------|------------|------------|------------|------------|------------|
| OBSERVER 1 |            | 0.09       | 0.06       | 0.06       | 0.17       |
| OBSERVER 2 | 0.09       |            | 0.05       | 0.36       | 0.30       |
| OBSERVER 3 | 0.06       | 0.05       |            | 0.12       | 0.11       |
| OBSERVER 4 | 0.06       | 0.36       | 0.12       |            | 0.25       |
| OBSERVER 5 | 0.17       | 0.30       | 0.11       | 0.25       |            |

#### SCAR 12 months of age

|            | OBSERVER 1 | OBSERVER 2 | OBSERVER 3 | OBSERVER 4 | OBSERVER 5 |
|------------|------------|------------|------------|------------|------------|
| OBSERVER 1 |            | 0.09       | 0.41       | 0.28       | 0.14       |
| OBSERVER 2 | 0.09       |            | 0.27       | 0.26       | 0.42       |
| OBSERVER 3 | 0.41       | 0.27       |            | 0.43       | 0.39       |
| OBSERVER 4 | 0.28       | 0.26       | 0.43       |            | 0.39       |
| OBSERVER 5 | 0.14       | 0.42       | 0.39       | 0.39       |            |

#### LCFH eight months of age

|            | OBSERVER 1 | OBSERVER 2 | OBSERVER 3 | OBSERVER 4 | OBSERVER 5 |
|------------|------------|------------|------------|------------|------------|
| OBSERVER 1 |            | 0.46       | 0.4        | 0.54       | 0.53       |
| OBSERVER 2 | 0.46       |            | 0.57       | 0.48       | 0.48       |
| OBSERVER 3 | 0.42       | 0.57       |            | 0.57       | 0.40       |
| OBSERVER 4 | 0.54       | 0.48       | 0.57       |            | 0.43       |
| OBSERVER 5 | 0.53       | 0.48       | 0.40       | 0.43       |            |

#### LCFH 12 months of age

|            | OBSERVER 1 | OBSERVER 2 | OBSERVER 3 | OBSERVER 4 | OBSERVER 5 |
|------------|------------|------------|------------|------------|------------|
| OBSERVER 1 |            | 0.26       | 0.56       | 0.50       | 0.60       |
| OBSERVER 2 | 0.26       |            | 0.45       | 0.61       | 0.29       |
| OBSERVER 3 | 0.56       | 0.45       |            | 0.68       | 0.51       |
| OBSERVER 4 | 0.50       | 0.61       | 0.68       |            | 0.48       |
| OBSERVER 5 | 0.60       | 0.29       | 0.51       | 0.48       |            |

**GDJD eight months of age**

|            | OBSERVER 1 | OBSERVER 2 | OBSERVER 3 | OBSERVER 4 | OBSERVER 5 |
|------------|------------|------------|------------|------------|------------|
| OBSERVER 1 |            | 0.03       | 0.14       | 0.06       | 0.10       |
| OBSERVER 2 | 0.03       |            | 0.10       | 0.06       | 0.08       |
| OBSERVER 3 | 0.14       | 0.10       |            | 0.18       | 0.09       |
| OBSERVER 4 | 0.06       | 0.06       | 0.18       |            | 0.09       |
| OBSERVER 5 | 0.10       | 0.08       | 0.09       | 0.09       |            |

**GDJD 12 months of age**

|            | OBSERVER 1 | OBSERVER 2 | OBSERVER 3 | OBSERVER 4 | OBSERVER 5 |
|------------|------------|------------|------------|------------|------------|
| OBSERVER 1 |            | 0.30       | 0.39       | 0.51       | 0.18       |
| OBSERVER 2 | 0.30       |            | 0.16       | 0.06       | 0.08       |
| OBSERVER 3 | 0.39       | 0.16       |            | 0.24       | 0.25       |
| OBSERVER 4 | 0.51       | 0.06       | 0.24       |            | 0.08       |
| OBSERVER 5 | 0.18       | 0.08       | 0.25       | 0.08       |            |

**GDAR eight months of age**

|            | OBSERVER 1 | OBSERVER 2 | OBSERVER 3 | OBSERVER 4 | OBSERVER 5 |
|------------|------------|------------|------------|------------|------------|
| OBSERVER 1 |            | 0.09       | 0.09       | 0.19       | 0.07       |
| OBSERVER 2 | 0.09       |            | 0.29       | 0.2        | 0.41       |
| OBSERVER 3 | 0.09       | 0.29       |            | 0.01       | 0.25       |
| OBSERVER 4 | 0.19       | 0.2        | 0.01       |            | 0.2        |
| OBSERVER 5 | 0.07       | 0.41       | 0.25       | 0.2        |            |

**GDAR 12 months of age**

|            | OBSERVER 1 | OBSERVER 2 | OBSERVER 3 | OBSERVER 4 | OBSERVER 5 |
|------------|------------|------------|------------|------------|------------|
| OBSERVER 1 |            | 0.11       | 0.26       | 0.01       | 0.39       |
| OBSERVER 2 | 0.11       |            | 0.28       | 0.19       | 0.21       |
| OBSERVER 3 | 0.26       | 0.28       |            | 0.16       | 0.39       |
| OBSERVER 4 | 0.01       | 0.19       | 0.16       |            | 0.12       |
| OBSERVER 5 | 0.39       | 0.21       | 0.39       | 0.12       |            |
